# Supplementary material
Source: publisher site journal article supplement (https://www.spandidos-publications.com/675/downloadSupplementary)

Figure S1. Cluster analysis of differential level proteins between ACBP and the control. The colors indicate the differential protein levels, which increase successively from green to dark red. Increased levels of proteins are indicated in red, and decreased levels are marked in green. ACBP, anticancer bioactive peptides.

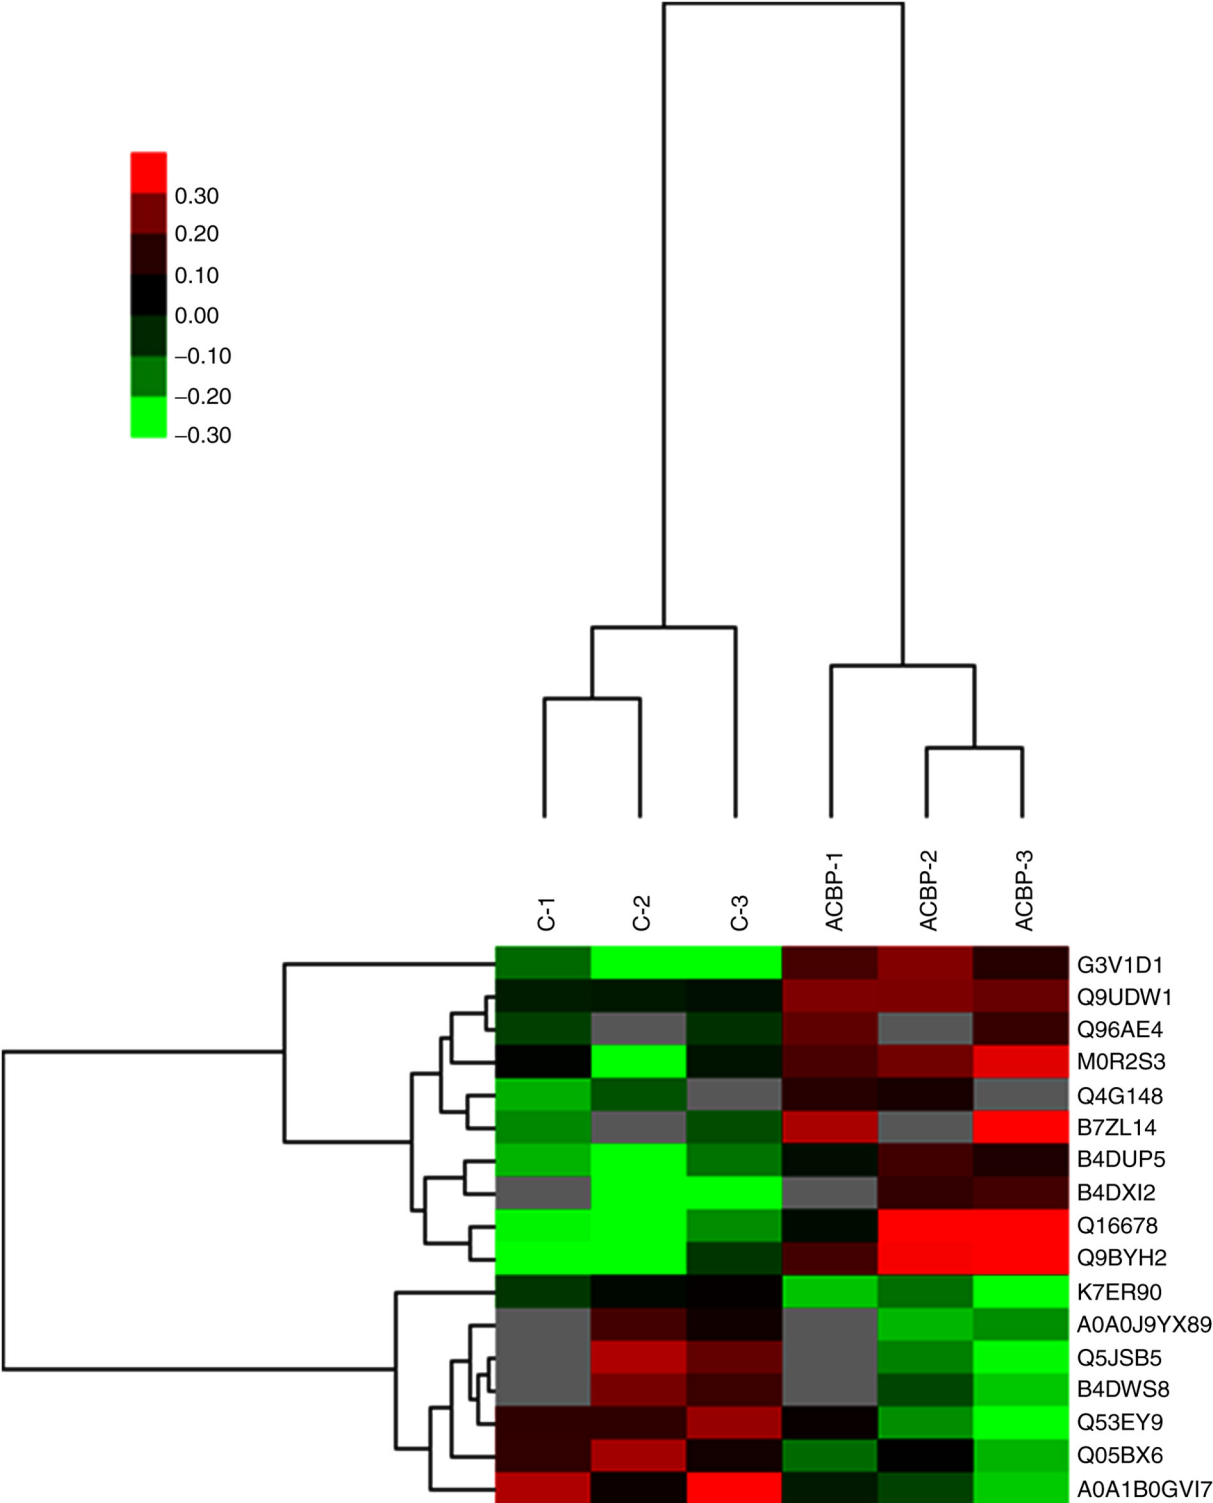

Figure S2. Cluster analysis of differential level proteins between OXA and the control. The colors indicate the differential protein levels, which increase successively from green to dark red. Increased levels of proteins are indicated in red, and decreased levels are marked in green. OXA, oxaliplatin.

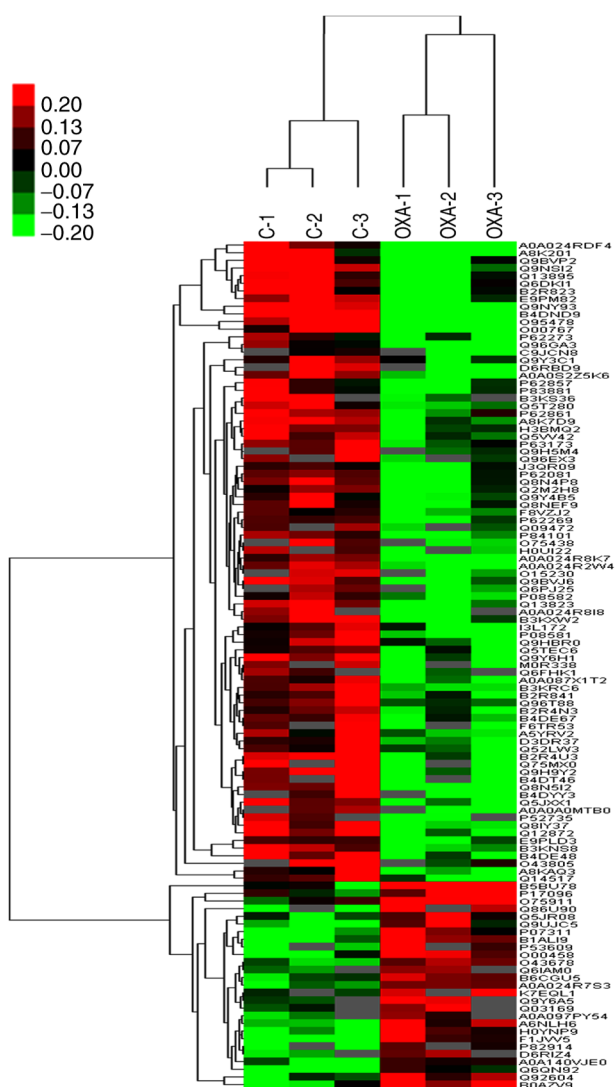

Supplement: Supplementary file 1 [file downloadSupplementary]
